# Supplementary material for: RBAP, a Rhodamine B-Based Derivative: Synthesis, Crystal Structure Analysis, Molecular Simulation, and Its Application as a Selective Fluorescent Chemical Sensor for Sn2+
Source: MDPI journal article supplement (doi:10.3390/molecules19067817), 2014-06-11
Supplement: s1 [file s1]

## Supplementary Materials

|                                                                                                  |    |
|--------------------------------------------------------------------------------------------------|----|
| <sup>1</sup> H-NMR of <b>RBAP</b> in acetone- <i>d</i> <sub>6</sub> :D <sub>2</sub> O (5:1, v/v) | S2 |
| <sup>13</sup> C-NMR of <b>RBAP</b> in CDCl <sub>3</sub>                                          | S3 |
| HRMS of <b>RBAP</b>                                                                              | S4 |
| Crystallographic data of <b>RBAP</b>                                                             | S5 |
| Association constant calculations                                                                | S5 |
| Determination of detection limit                                                                 | S6 |
| Absorbance of <b>RBAP</b> at 561 nm as a function of Sn <sup>2+</sup> concentration              | S7 |
| Fluorescence intensities of <b>RBAP</b> at 583 nm upon the addition of Sn <sup>2+</sup>          | S7 |
| HOMO-LUMO energy calculations for <b>RBAP</b> and the <b>RBAP</b> -Sn <sup>2+</sup> complex      | S8 |

**Figure S1.**  $^1\text{H}$ -NMR of **RBAP** in acetone- $d_6$ : $\text{D}_2\text{O}$  (5:1, v/v).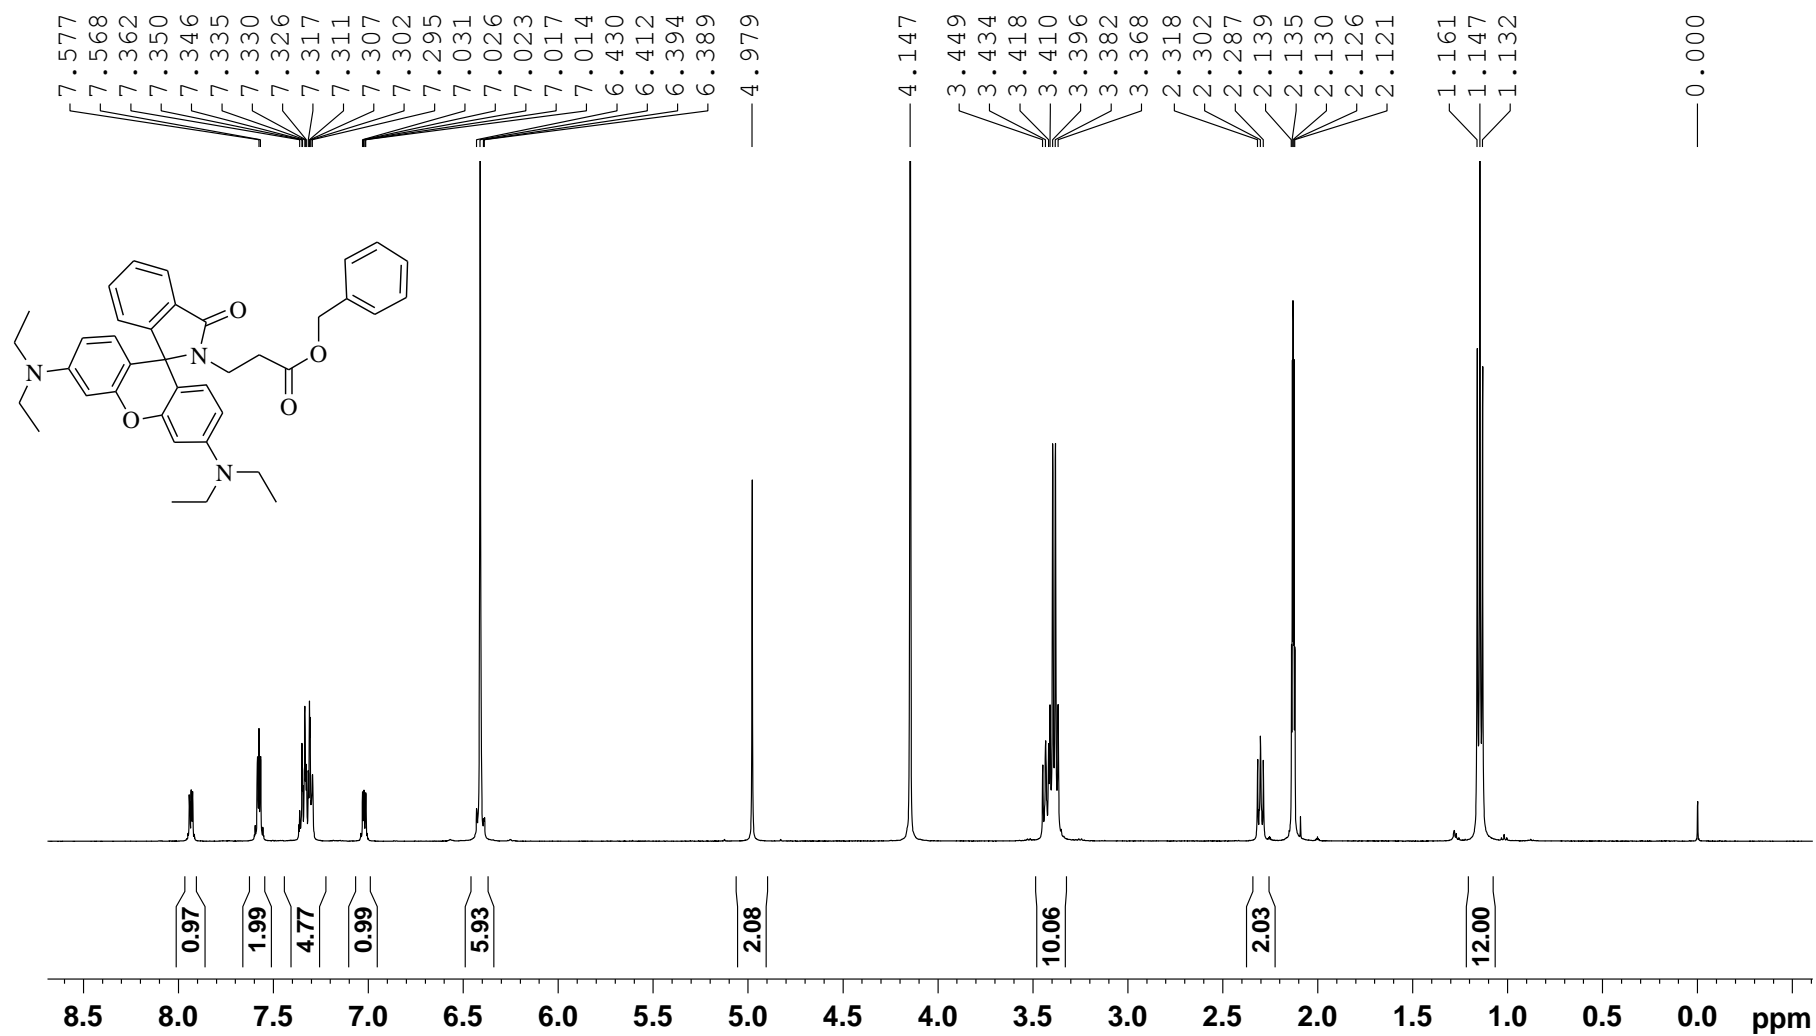

Figure S2.  $^{13}\text{C}$ -NMR of RBAP in  $\text{CDCl}_3$ .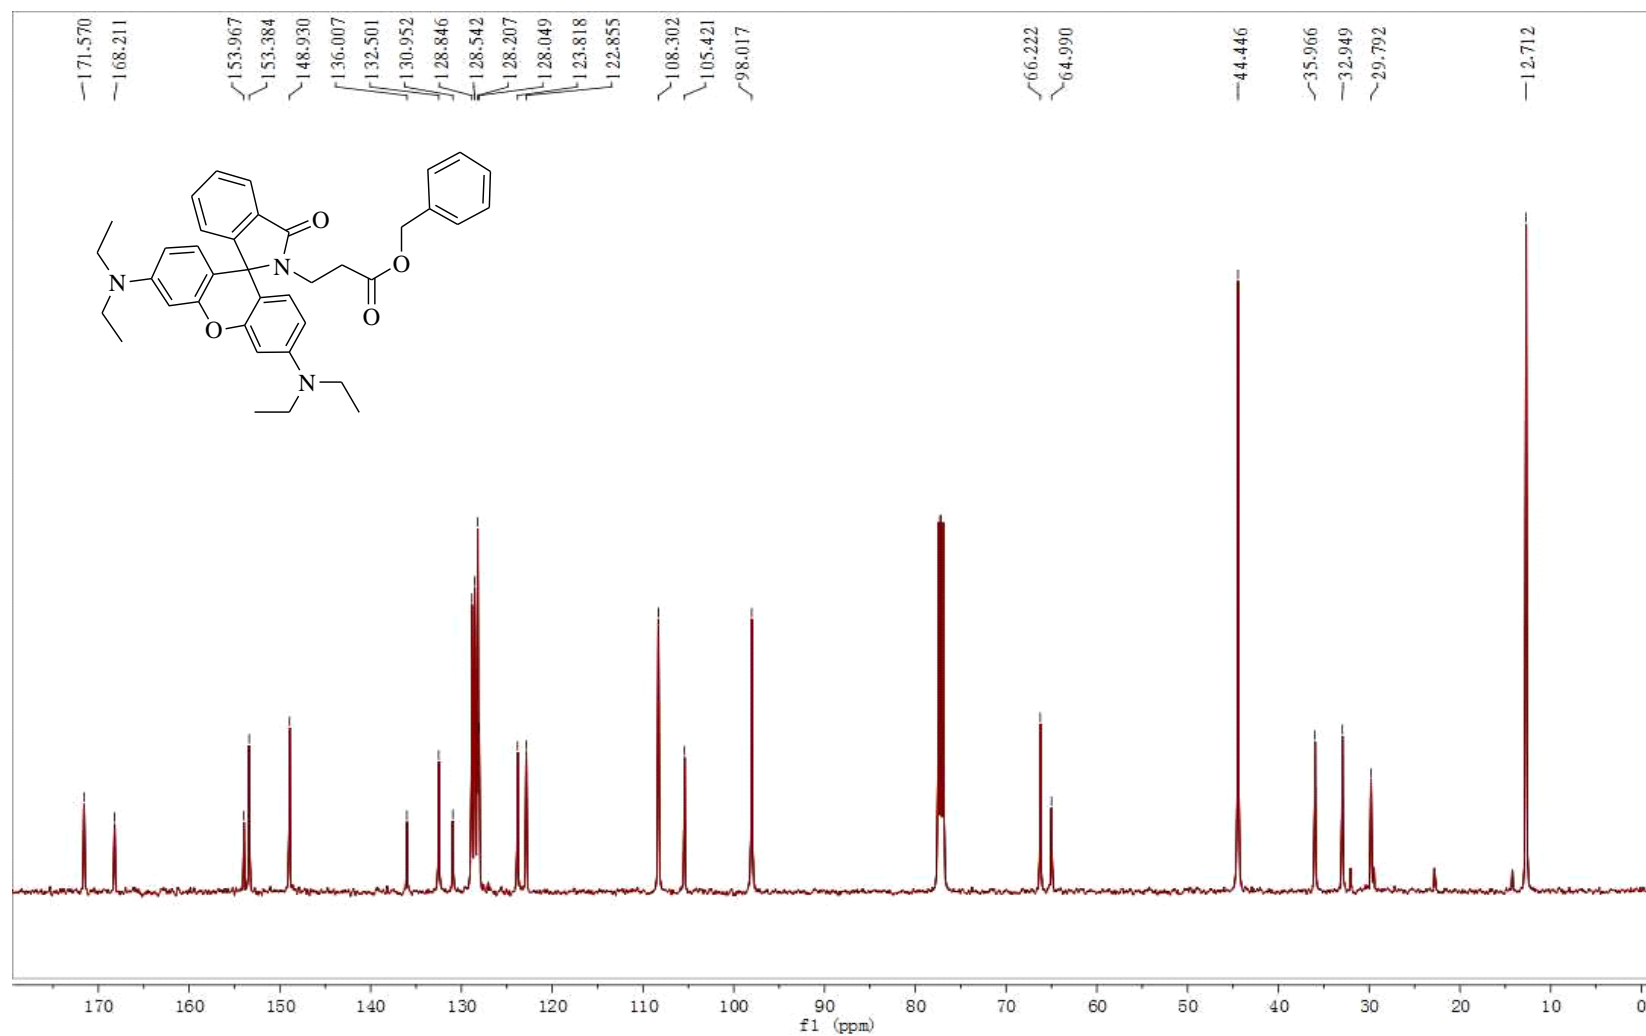

Figure S3. HRMS of RBAP.

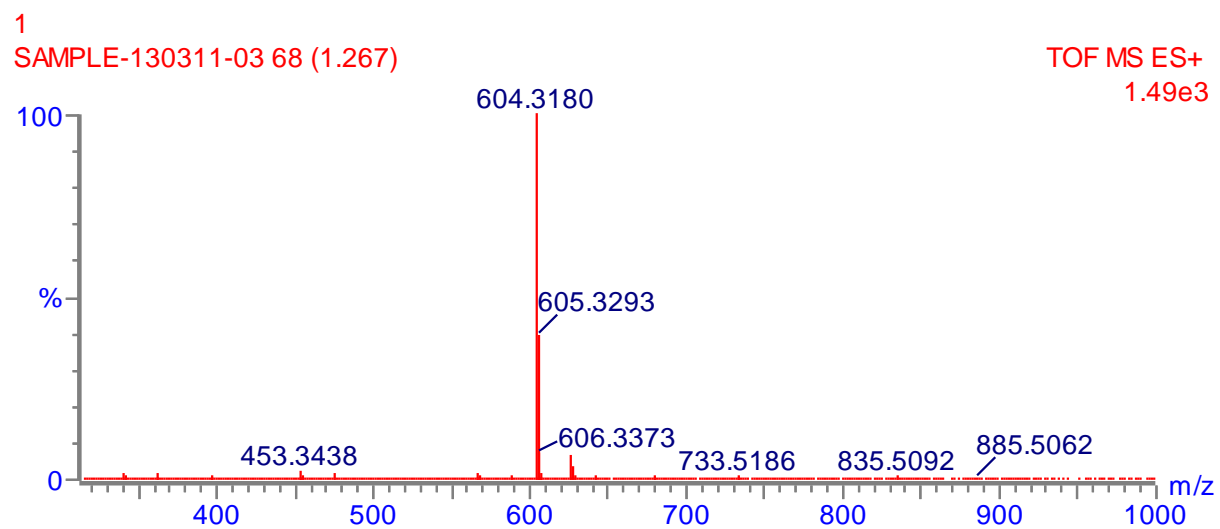

### Crystallographic data of RBAP

<sup>a</sup>  $w = 1/[\sigma^2(F_o)^2 + (0.0893P)^2 + 1.6528P]$ , where  $P = (F_o^2 + 2F_c^2)/3$

| complex                                | RBAP                                                          |
|----------------------------------------|---------------------------------------------------------------|
| Formula                                | C <sub>38</sub> H <sub>41</sub> N <sub>3</sub> O <sub>4</sub> |
| Formula weight                         | 603.74                                                        |
| Crystal system                         | Monoclinic                                                    |
| space group                            | <i>P</i> 2(1)/C                                               |
| a (Å)                                  | 12.5467(15)                                                   |
| b (Å)                                  | 22.338(3)                                                     |
| c (Å)                                  | 12.0855(14)                                                   |
| α (°)                                  | 90.00                                                         |
| β (°)                                  | 103.278(2)                                                    |
| γ (°)                                  | 90.00                                                         |
| Volume(Å <sup>3</sup> )                | 3296.6(7)                                                     |
| Z                                      | 4                                                             |
| T, (K)                                 | 296(2)                                                        |
| μ (mm <sup>-1</sup> )                  | 0.079                                                         |
| D <sub>calcd</sub> (g/m <sup>3</sup> ) | 1.216                                                         |
| F(000)                                 | 1288                                                          |
| Reflections collected                  | 6128                                                          |
| Unique reflections                     | 4350                                                          |
| Goof                                   | 1.036                                                         |
| R <sub>1</sub> [I > 2σ(I)]             | 0.0645                                                        |
| wR <sub>2</sub> [I > 2σ(I)]            | 0.1745 <sup>a</sup>                                           |
| CCDC                                   | CCDC 969599                                                   |

### Calculation of Association Constant

The apparent association constant was calculated by the following formula:  $F - F_0 = \Delta F = [\text{Sn}^{2+}](F_{\text{max}} - F_0)/(1/K_a + [\text{Sn}^{2+}])$ , where  $F$  is the obtained fluorescence intensity of **RBAP** with different equivalent of  $\text{Sn}^{2+}$  at the emission wavelength,  $F_{\text{max}}$  is the saturated fluorescence intensity of **RBAP** with different equivalent of  $\text{Sn}^{2+}$  at the emission wavelength, and  $F_0$  is the fluorescence intensity of **RBAP** at the emission wavelength. Plot  $1/\Delta F$  against  $1/[\text{Sn}^{2+}]$  to a linear relation formula ( $y = A + Bx$ , Figure S4).  $K_a$  was calculated from  $A/B = 7.96893 \times 10^{-6}/3.00674 \times 10^{-10} = 2.65 \times 10^4 \text{ M}^{-1}$ . (Table S1, Figure S4).

**Table S1.** Detailed Calculations for Ka.

| $[\text{Sn}^{2+}](\text{M})$ | $1/[\text{Sn}^{2+}]$ | F                     | F - F <sub>0</sub> | $1/(F - F_0)$            |
|------------------------------|----------------------|-----------------------|--------------------|--------------------------|
| 0                            |                      | 5000(F <sub>0</sub> ) |                    |                          |
| $1.00 \times 10^{-5}$        | $1.00 \times 10^5$   | $5.11 \times 10^4$    | $4.61 \times 10^4$ | $2.17 \times 10^{-5}$    |
| $1.50 \times 10^{-5}$        | 66,666.67            | $8.06 \times 10^4$    | $7.56 \times 10^4$ | $1.32254 \times 10^{-5}$ |
| $2.00 \times 10^{-5}$        | 50,000               | $1.56 \times 10^5$    | $1.51 \times 10^5$ | $6.62291 \times 10^{-6}$ |
| $2.50 \times 10^{-5}$        | 40,000               | $2.99 \times 10^5$    | $2.94 \times 10^5$ | $3.4007 \times 10^{-6}$  |
| $3.00 \times 10^{-5}$        | 33,333.33            | $4.21 \times 10^5$    | $4.16 \times 10^5$ | $2.40186 \times 10^{-6}$ |

**Figure S4.** Plot  $1/\Delta F$  against  $1/[\text{Sn}^{2+}]$  to a linear relation formula ( $y = A + Bx$ ).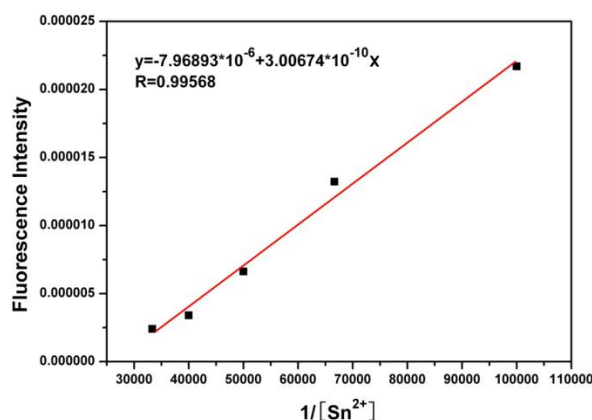

### Determination of Detection Limit

The detection limit of RBAP for  $\text{Sn}^{2+}$  was determined from the following equation:  $\text{DL} = K * (\text{SD}/S)$ , where  $K = 3$ ; SD is the standard deviation of the blank solution detected for 5 times; S is the slope of the calibration curve. SD value calculated from standard deviation of the blank solution (RBAP (10  $\mu\text{M}$ ) in a methanol/ $\text{H}_2\text{O}$  (2:3, v:v)) is 66.14 (Table S3). From Figure S5 we get slope = 4515. Thus, using the formula we get the Detection Limit =  $3 \times (66.14/4515) = 0.044 \mu\text{M}$ .

**Figure S5.** Fluorescence intensity at 583 nm of RBAP (10  $\mu\text{M}$ ) as a function  $\text{Sn}^{2+}$  concentration.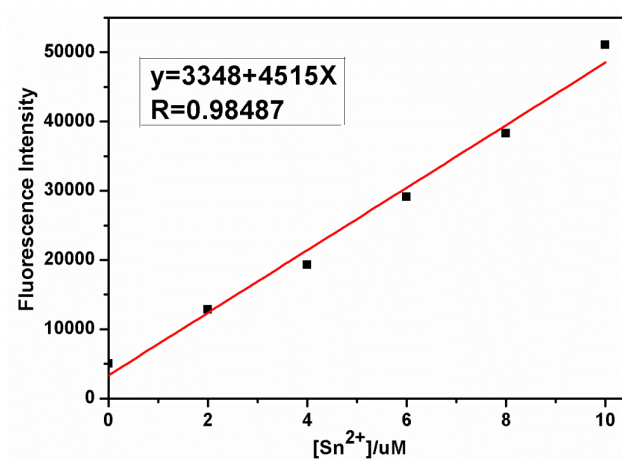

Table S2. Calculation for  $SD = \sqrt{\frac{1}{N-1} \sum_{i=1}^N (X_i - \bar{X})^2}$ .

| F.I. of the Blank Solution |      | $X_i - \bar{X}$<br>(I = 1, 2, 3, 4, 5) | $(X_i - \bar{X})^2$                      |         | SD    |
|----------------------------|------|----------------------------------------|------------------------------------------|---------|-------|
| $X_1$                      | 5124 | 76.4                                   | $Y_1$                                    | 5836.96 |       |
| $X_2$                      | 4963 | −84.6                                  | $Y_2$                                    | 7157.16 |       |
| $X_3$                      | 5057 | 9.4                                    | $Y_3$                                    | 88.36   |       |
| $X_4$                      | 5000 | −47.6                                  | $Y_4$                                    | 2265.76 |       |
| $X_5$                      | 5094 | 46.4                                   | $Y_5$                                    | 2152.96 |       |
| average value $\bar{X}$    |      | 5047.6                                 | $SD^2 = (Y_1 + Y_2 + Y_3 + Y_4 + Y_5)/4$ |         | 66.14 |

Figure S6. Absorbance of **RBAP** at 561 nm as a function of  $Sn^{2+}$  concentration.

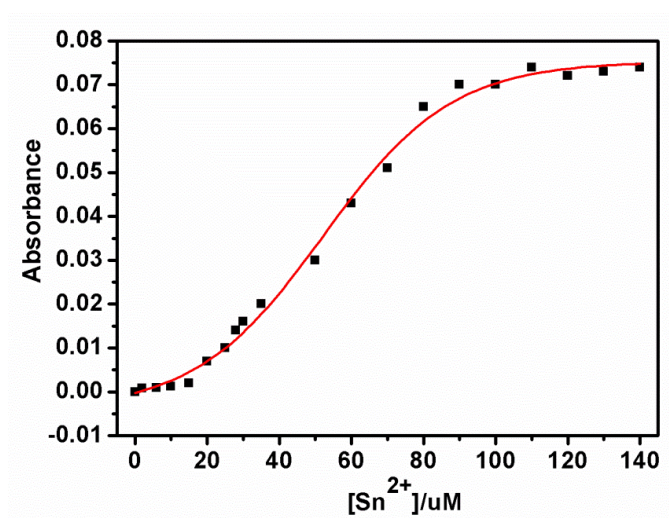

Figure S7. Fluorescence intensities of **RBAP** at 583 nm upon the addition of  $Sn^{2+}$ .

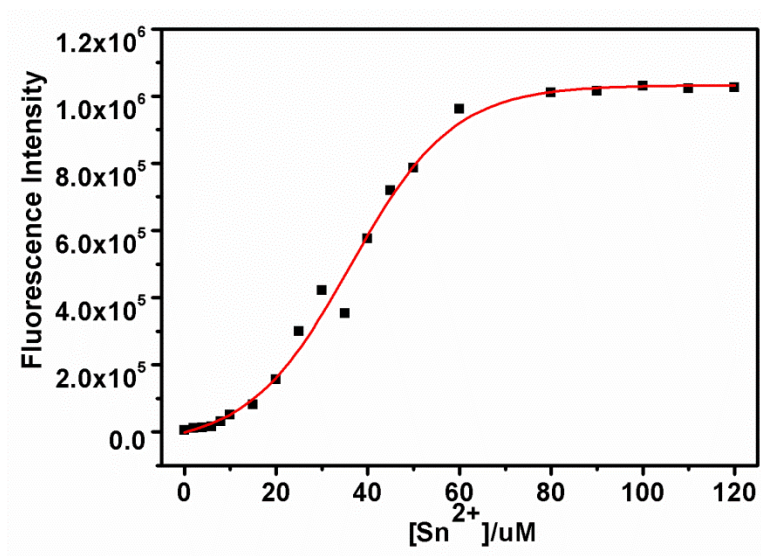

**Table S3.** HOMO-LUMO energy calculated for **RBAP** and the **RBAP-Sn<sup>2+</sup>** complex.

| Species                     | E(HOMO) | E(LUMO) | $\Delta E$<br>(Hartree) | $\Delta E$<br>(kcal/mol) |
|-----------------------------|---------|---------|-------------------------|--------------------------|
| <b>RBAP</b>                 | −0.19   | −0.03   | 0.16                    | 102.38                   |
| <b>RBAP-Sn<sup>2+</sup></b> | −0.38   | −0.30   | 0.09                    | 55.74                    |

© 2014 by the authors; licensee MDPI, Basel, Switzerland. This article is an open access article distributed under the terms and conditions of the Creative Commons Attribution license (<http://creativecommons.org/licenses/by/3.0/>).
